# Supplementary material for: Application of aqueous Ag:ZnInSe quantum dots to non-toxic sensitized solar cells
Source: Royal Society of Chemistry journal article supplement (doi:10.1039/c5ra04242a), 2015-01-01
Supplement: c5ra04242a1.pdf [file c5ra04242a1.pdf]

## **The application of aqueous Ag:ZnInSe quantum-dots on non-toxic sensitized solar cell**

Zhao-Chong Wang, Shu-Hong Xu<sup>2\*</sup>, Chun-lei Wang, Li Zhu, Fan Bo, Xiao-Yan Lin,  
Zhu-Yuan Wang, Yi-Ping Cui<sup>1\*</sup>

Advanced Photonics Center, School of Electronic Science and Engineering, Southeast  
University, Nanjing, 210096, China

\*Author to whom correspondence should be addressed, E-mail: [cyp@seu.edu.cn](mailto:cyp@seu.edu.cn);

<sup>2</sup>xush@seu.edu.cn.

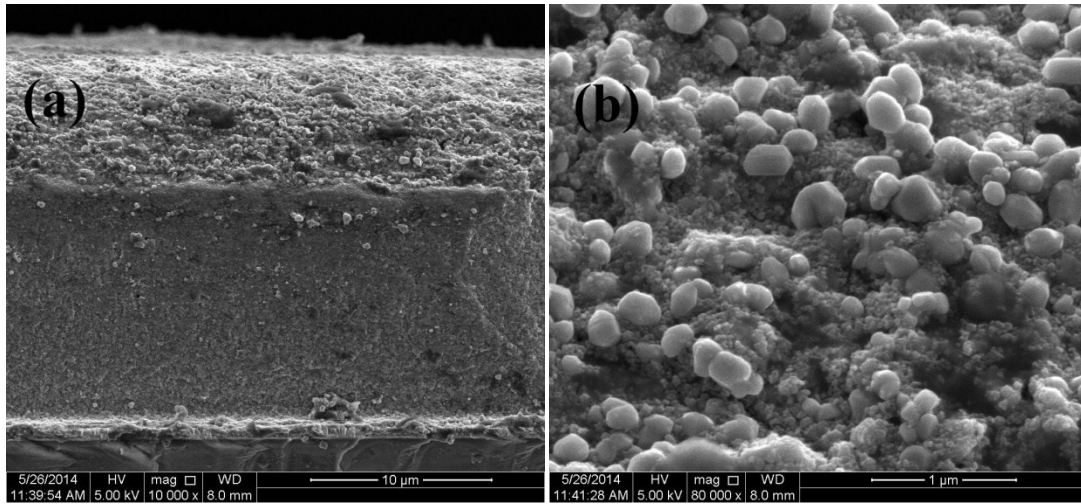

**Figure S1.** (a) SEM images of TiO<sub>2</sub> photoanode from the cross-sectional view (b)

Enlarged image of scattering layer.

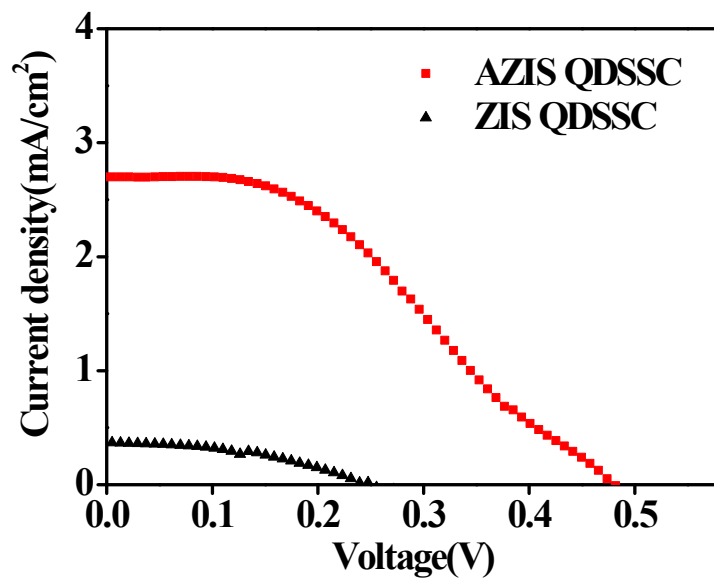

**Figure S2.**  $J$ - $V$  curves of ZIS and AZIS QDSSCs.
